1 **Title: A Precision Medicine Approach to Stress Testing Using Metabolomics and**  
2 **Microribonucleic Acids**

3  
4 Alexander T. Limkakeng Jr., MD, MHSc, FACEP<sup>1</sup> (Corresponding Author), Laura-Leigh  
5 Rowlette, BS<sup>2</sup>, Ace Hatch, PhD<sup>3</sup>, Andrew B. Nixon, PhD<sup>3</sup>, Olga Ilkayeva, PhD<sup>4</sup>, David L.  
6 Corcoran, PhD<sup>5</sup>, Jennifer L. Modliszewski, PhD<sup>5</sup>, S. Michelle Griffin, MPH, EMT<sup>1</sup>, Ephraim L.  
7 Tsalik MD, PhD<sup>6,7,8</sup>, Geoffrey S. Ginsburg MD, PhD<sup>6,9</sup>, Deepak Voora, MD<sup>6,9</sup>

- 8  
9 1. Division of Emergency Medicine, Duke University, Durham, North Carolina,  
10 United States of America  
11  
12 2. Sequencing & Genomic Technologies Shared Resource, Duke Center for  
13 Genomic and Computational Biology, Duke University, Durham, North Carolina,  
14 United States of America  
15  
16 3. Division of Medical Oncology, Duke University, Durham, North Carolina, United  
17 States of America  
18  
19 4. Duke Molecular Physiology Institute, Duke University, Durham, North Carolina,  
20 United States of America  
21  
22 5. Genomic Analysis and Bioinformatics Shared Resource, Duke Center for  
23 Genomic and Computational Biology, Duke University, Durham, North Carolina,  
24 United States of America  
25  
26 6. Center for Applied Genomics & Precision Medicine, Duke University, Durham,  
27 North Carolina, United States of America  
28  
29 7. Emergency Medicine Service, Durham Veterans Affairs Health Care System, Durham, NC  
30 USA  
31  
32 8. Division of Infectious Diseases & International Health, Department of Medicine, Duke  
33 University, Durham, North Carolina, United States of America  
34  
35 9. Division of Cardiology, Duke University, Durham, North Carolina, United States  
36 of America  
37

38 \*Corresponding Author email: [alexander.limkakeng@duke.edu](mailto:alexander.limkakeng@duke.edu) (ATL)

## 39 **ABSTRACT**

40 **Background:** Acute coronary syndrome (ACS) is a growing global health problem, and  
41 precision medicine techniques hold promise for the development of diagnostic indicators of  
42 ACS. In this pilot, we sought to assess the utility of an integrated analysis of metabolomic and  
43 microRNA data in peripheral blood to distinguish patients with abnormal cardiac stress testing  
44 from matched controls.

45 **Methods:** We used prospectively collected samples from emergency department (ED)  
46 patients placed in an ED-based observation unit who underwent stress testing for ACS. We  
47 isolated microRNA and quantified metabolites from plasma collected before and after stress  
48 testing in patients with myocardial ischemia on stress testing versus those with normal stress  
49 tests. The combined metabolomic and microRNA data were analyzed jointly for case (ischemia)  
50 and 1:1 matched control patients in a supervised, dimension-reducing discriminant analysis.  
51 Two integrative models were implemented: a baseline model utilizing data collected prior to  
52 stress-testing (T0) and a stress-delta model, which included the difference between post-stress  
53 test (T1) and pre-stress test (T0).

54 **Results:** Seven case patients with myocardial ischemia on ED cardiac stress testing (6  
55 females, 85% Caucasian, mean Thrombolysis In Myocardial Infarction Score=3, 4 patients  
56 ultimately received percutaneous coronary intervention) were 1:1 age and sex-matched to  
57 controls. Several metabolites and microRNAs were differentially expressed between cases and  
58 controls. Integrative analysis of the baseline levels of metabolites and microRNA expression  
59 showed modest performance for distinguishing cases from controls with an overall error rate of  
60 0.143. The stress-delta model showed worse performance for distinguishing cases from  
61 controls, with an overall error rate of 0.500.

62 **Conclusions:** Given our small sample size, results are hypothesis-generating. However,  
63 this pilot study shows a potential method for a precision medicine approach to cardiac stress  
64 testing in patients undergoing workup for ACS.

65

66 Keywords: Coronary heart disease, stress testing, metabolomics, transcriptomics, microRNA,  
67 precision medicine

68

## 69 Introduction

70 Acute Coronary Syndrome (ACS). remains one of the most significant health problems  
71 globally(1). A cornerstone of risk assessment for ACS is provocative stress testing(2-5).  
72 Conceptually, stress testing is composed of two elements, a stressor and an evaluation of  
73 function. The evaluative function of stress testing currently depends on imaging technology to  
74 evaluate for the presence of ischemic myocardium. However, imaging evaluation requires  
75 specialized equipment and technical expertise. A blood-based biomarker approach to cardiac  
76 stress testing could obviate the need for expensive equipment or highly trained personnel.

77

78 MicroRNAs are small non-coding segments of RNA circulating that can be found in the  
79 bloodstream and act as paracrine regulators of local cellular gene transcription(6). MicroRNA  
80 profiles may be able to distinguish among various causes of myocardial injury, e.g. myocardial  
81 ischemia from heart failure(7). Based on prior literature, a number of microRNAs seem  
82 promising for identifying myocardial ischemia from coronary artery disease: miR-1(8-12), miR-  
83 133(8, 9, 13), miR-208(9, 12, 14), miR-499(8, 9, 12-14), miR-126(10, 13, 15). Thus, microRNAs  
84 are a promising area of biomarker research.

85

86           Metabolomics is another promising modality for the characterization of function in high-  
87 energy utilization organs such as the heart. Such analyses examine a wide range of  
88 fundamental biological molecules, many of which are connected to underlying metabolic  
89 processes in the body such as fatty acids and oxidation products. The concentration of these  
90 molecules can also rapidly change in response to acute disease states. It has been shown that  
91 certain amino acids and acylcarnitines levels in peripheral blood are associated with long-term  
92 risk of cardiovascular disease, particularly coronary related(16-18). We previously reported the  
93 analysis of stress-induced changes in selected metabolites including amino acids and  
94 acylcarnitines(19).

95  
96           In current clinical practice, the information gathered from stress testing is usually  
97 reduced down to a single data dimension to simplify decision-making. However, it is widely  
98 recognized that a precision medicine strategy for chest pain evaluation will require expanding  
99 the number of biomarkers (whether blood-based, imaging, or in other forms) and to integrate  
100 information to provide a more accurate answer. The challenge associated with expanding the  
101 number of biomarkers is that very large datasets can be problematic for biostatistical analysis.  
102 However, several dimension-reducing biostatistical approaches now allow the integration of  
103 large datasets from different categories of molecules(20).

104  
105           In this paper, we used transcriptomic and metabolomic approaches to demonstrate the  
106 feasibility of a biomarker-based stress test using precision medicine techniques. We also sought  
107 to develop the technical capabilities and protocols to study serially measured microRNAs and  
108 metabolites in patients undergoing cardiac stress testing for symptoms of ACS. We believe this  
109 novel model of stress testing represents an exciting opportunity to apply a precision medicine  
110 approach to cardiac disease diagnosis and prognosis.

111

## 112 **Methods**

### 113 **Study setting and population**

114 We conducted a pilot study to determine whether serial microRNA and metabolomic  
115 data could be combined to enhance the diagnostic performance of cardiac stress testing. We  
116 used peripheral blood samples in EDTA collection tubes from a biorepository created to study  
117 changes in high-sensitivity troponin and B-type natriuretic peptide during stress testing. This  
118 biorepository has been previously described(21, 22). Briefly, samples were collected from adult  
119 emergency department (ED) patients who had symptoms of ACS and who underwent stress  
120 testing in our observation unit. All patients, as a condition of enrollment, underwent standard  
121 symptom-limited Bruce Protocol exercise echocardiogram tests as part of their usual care.  
122 These tests reported the presence or absence of inducible myocardial ischemia, defined as  
123 stress-induced regional wall motion abnormality in at least one segment. All tests were  
124 interpreted by board-certified cardiologists who were blinded to any biomarker data. Two  
125 reviewers independently confirmed the accuracy of the reports for this study. Patients had  
126 follow-up phone calls at one year.

127

### 128 **Metabolomic analyses**

129 Similar to our prior work(19), we used standard mass spectrometry to determine plasma  
130 quantities of selected acylcarnitines and amino acids, as previously described (Table 1)(23).  
131 We used standard liquid-handling steps for the Genesis RSP 150/4 Robotic Sample Processor  
132 (Tecan AG, Maennedorf, Switzerland). Plasma samples were spiked with cocktails of stable  
133 isotope-labeled standards specific to each assay module for quantitative measurement of these  
134 targeted analytes. The proteins were precipitated with methanol, supernatant dried, and  
135 esterified with hot, acidic methanol (acylcarnitines) or n-butanol (amino acids). We then used

136 tandem mass spectrometry on a Quattro Micro instrument (Waters Corporation, Milford, MA) to  
 137 analyze acylcarnitines and amino acids. The lower level of quantitation for amino acids was 0.5  
 138  $\mu\text{M}$  and for acylcarnitines the limit of quantitation was 0.015  $\mu\text{M}$ .

139

140 Table 1. Metabolites Assayed

| <b>Amino Acids</b> | <b>Acylcarnitines</b> |               |                   |
|--------------------|-----------------------|---------------|-------------------|
| Alanine            | C2                    | C10:2         | C16:1             |
| Arginine           | C3                    | C10:1         | C16               |
| Asparagine         | C4/Ci4                | C10           | C16:1-OH/C14:1-DC |
| Citrulline         | C5:1                  | C7-DC         | C16-OH/C14-DC     |
| Glutamine          | C5                    | C8:1-DC       | C18:2             |
| Glycine            | C4-OH                 | C10-OH/C8-DC  | C18:1             |
| Histidine          | C6                    | C12:1         | C18               |
| Leucine/Isoleucine | C5-OH/C3-DC           | C12           | C18:2-OH          |
| Methionine         | C4-DC/Ci4-DC          | C12-OH/C10-DC | C18:1-OH/C16:1-DC |
| Ornithine          | C8:1                  | C14:2         | C18-OH/C16-DC     |
| Phenylalanine      | C8                    | C14:1         | C20:4             |
| Proline            | C5-DC                 | C14           | C20               |
| Serine             | C8:1-OH/C6:1-<br>DC   | C14:1-OH      | C18:1-DC          |
| Tyrosine           | C6-DC                 | C14-OH/C12-DC | C20-OH/C18-DC     |
| Valine             | C10:3                 | C16:2         | C22               |

141

142

## 143 **MicroRNA analyses**

144 We extracted RNA using the Qiagen miRNeasy Serum/Plasma Advanced Kit (Qiagen,  
145 Frederick, MD) from plasma collected in ethylenediamine tetraacetic acid (EDTA) tubes. We  
146 used a standard QIASeq miRNA Library Kit protocol (Qiagen, Frederick, MD) for library  
147 preparation, and library quality control (QC) was performed on the Agilent Bioanalyzer with the  
148 Deoxyribonucleic Acid (DNA) High-Sensitivity Assay. Samples were sequenced on the Illumina  
149 (San Diego, CA) HiSeq 4000 Sequencer at 50 bp Single Read.

150

## 151 **Data Analysis**

152 For all analytes, comparisons were made between cases and controls at baseline  
153 (baseline model), and the difference between pre- and post- stress test (stress-delta model).

154

### 155 **MicroRNA analysis**

156 SmRNA-seq data were processed using the Trim Galore toolkit(24), which employs  
157 Cutadapt(25) to trim low-quality bases and Illumina sequencing adapters from the 3' end of the  
158 reads. Only reads that were 18-28 nucleotides in length after trimming were kept for further  
159 analysis. Reads were mapped to the hg19 version of the human genome using the Bowtie  
160 alignment tool(26). Reads were kept for subsequent analysis if they mapped to no more than 13  
161 genomic locations. Gene counts were compiled using custom scripts that compare mapped  
162 read coordinates to the miRbase microRNA database(27). Reads that match the coordinates of  
163 the known mature microRNAs were kept if they perfectly matched the coordinates of the miRNA  
164 seed while not varying by more than 2 nucleotides on the 3' end of the mature miRNA. Only  
165 mature miRNAs that had at least 10 reads in any given sample were used in subsequent  
166 analysis. Normalization was performed using the DESeq2 Bioconductor package from the R  
167 statistical programming environment applying the 'poscounts' approach to eliminate systematic  
168 differences across the samples(28). The normalized data were log-transformed and differential

169 expression was tested using linear regression. For the stress-delta model, we employed a  
170 mixed-effects model with the patient ID as a random effect. The false discovery rate was used  
171 to adjust for multiple hypothesis testing.

172

173 Targeted metabolite data were log-transformed prior to analysis and a PCA was conducted to  
174 assess for the presence of outliers and confounding demographic factors. MicroRNA-Seq count  
175 data were also log-transformed. For the integrative analysis, microRNAs that were missing in  
176 half or more of the samples were removed from the data set. All integrative analyses were  
177 conducted with baseline (“T0”, pre-stress test) and delta (“T1” – “T0”) data sets, where T1  
178 corresponds to post–stress test samples.

179

## 180 **Regularized Canonical Correlation Analysis**

181 Regularized canonical correlation analysis (rCCA) seeks to extract latent variables that  
182 maximize the correlation between the two data sets, but with an additional regularization step  
183 that reduces the number of variables contributing to each component. An initial leave-one-out  
184 cross-validation step can be performed to select the regularization parameters for each data set.  
185 To explore correlation between the metabolomic and microRNA baseline and delta datasets, a  
186 rCCA was performed in the mixOmics package in R. Five components were retained in our final  
187 model.

188

## 189 **Integrative Sparse Discriminative Analysis**

190 To identify metabolites and microRNAs that discriminate between control and case subjects, we  
191 examined both datasets jointly in the mixOmics package in R using the DIABLO (Data  
192 Integration Analysis for Biomarker discovery using Latent variable approaches for ‘Omics  
193 studies) method. DIABLO is a supervised, dimension-reducing discriminant analysis using a



194 sparse projection to latent structures analysis with a discriminant component; this performs  
195 similar to a canonical correlation analysis with the exception that covariance rather than  
196 correlation is maximized.

197

198 After determining the optimal number of components, the number of variables for each  
199 component was chosen through leave-one-out cross-validation over a grid of possible number  
200 of variables per component (minimum=1, maximum=50 and 30 for the baseline and delta data  
201 sets, respectively). Performance of the final model was assessed with leave-one-out cross-  
202 validation with the centroids distance.

203

## 204 RESULTS

205 The baseline demographic and clinical characteristics of each subject are summarized in Table  
206 2. Patients had a high rate of hypertension, hyperlipidemia, and diabetes. Six of the 7 Case  
207 patients had subsequent coronary angiography during the index visit, with 5 of them having at  
208 least one artery with stenosis >50%. Four patients underwent subsequent percutaneous  
209 coronary interventions. All Control patients underwent follow up at 1 year from their index ED  
210 visit without any cardiac diagnosis being made.

211 Table 2. Patient Demographics and Clinical Characteristics

| Characteristic            | Cases<br>N (%) | Controls<br>N (%) |
|---------------------------|----------------|-------------------|
| Age (Years), Mean (Range) | 63.9 (54-76)   | 64.0 (55-71)      |
| Sex                       |                |                   |
| Male                      | 1 (14.3%)      | 1 (14.3%)         |
| Female                    | 6 (85.7%)      | 6 (85.7%)         |

|                                    |           |           |
|------------------------------------|-----------|-----------|
| Race                               |           |           |
| Black or African American          | 1 (14.3%) | 3 (42.9%) |
| White / Caucasian                  | 6 (85.7%) | 4 (57.1%) |
| Hypertension                       | 6 (85.7%) | 4 (57.1%) |
| Diabetes                           | 4 (57.1%) | 3 (42.9%) |
| History of Tobacco Use             | 3 (42.9%) | 0 (0%)    |
| Hyperlipidemia                     | 6 (85.7%) | 3 (42.9%) |
| Past Myocardial Infarction         | 4 (57.1%) | 1 (14.3%) |
| History of Coronary Artery Disease | 5 (71.4%) | 2 (28.6%) |

212

## 213 **Metabolomics Results**

214 The concentrations of assayed amino acids and acylcarnitines both before and after stress  
215 testing for each subject are available in S1 File. Among acylcarnitines, acetylcarnitine (C2) and  
216 the hexanoylcarnitine (C6-DC/C8-OH) showed the greatest absolute differences in baseline  
217 values between cases and controls (7.54  $\mu\text{M}$  versus 9.92  $\mu\text{M}$  ( $p=0.54$ ) and 0.12  $\mu\text{M}$  versus 0.08  
218  $\mu\text{M}$ , ( $p=0.16$ ) respectively). Among amino acids, glycine, proline, and tyrosine showed the  
219 greatest absolute differences in baseline values between cases and controls (421.04  $\mu\text{M}$  versus  
220 332.96  $\mu\text{M}$ , ( $p=0.17$ ); 184.87  $\mu\text{M}$  versus 222.92  $\mu\text{M}$ , ( $p=0.42$ ); and 62.24  $\mu\text{M}$  versus 75.08  $\mu\text{M}$ ,  
221 ( $p=0.13$ ), respectively).

222

223 The greatest absolute differences in stress-delta values between cases and controls were seen  
224 in metabolites octanoylcarnitine (C8) and decanoylcarnitine (C10) (-0.004  $\mu\text{M}$  versus -0.06  $\mu\text{M}$   
225 ( $p=0.39$ ) and -0.02  $\mu\text{M}$  versus -0.10  $\mu\text{M}$ , ( $p=0.42$ ) respectively). Among amino acids proline,  
226 valine, and asparagine showed the highest stress delta greatest absolute differences in stress-

227 delta values between cases and controls (33.86  $\mu\text{M}$  versus -0.79  $\mu\text{M}$ , ( $p=0.24$ ); 4.80  $\mu\text{M}$  versus  
228 -21.75  $\mu\text{M}$ , ( $p=0.44$ ); and 10.80  $\mu\text{M}$  versus -15.57  $\mu\text{M}$ , ( $p=0.26$ ).

229

## 230 **MicroRNA Results**

231 Among 1,238 microRNAs, 52 were differentially expressed ( $p<0.05$ ) between cases and  
232 controls at baseline and 12 had significantly different stress-deltas with unadjusted analysis.  
233 These microRNAs are listed in S2 File. We constructed heat maps (Figs 1 and 2) to show  
234 differential baseline and stress-delta microRNA expression in cases and controls. PCA plots  
235 demonstrated that moderate variance was explained by MicroRNA principal components (S1-S3  
236 Figs).

237 **Figs 1 and 2. Baseline and Stress-Delta MicroRNA Heatmap.** Heat maps  
238 demonstrating key baseline and stress-delta microRNAs that are different between case  
239 (myocardial ischemia) and matched control patients. The Baseline model (Fig 1) shows  
240 the z-score transformed expression value and the Stress-Delta heatmap (Fig 2) shows  
241 the  $\log_2$  (fold-change) values for each patient across time. Both heatmaps have been  
242 clustered by both genes and samples using a correlation distance with complete linkage.  
243

## 244 **Integrative Analysis**

245 We performed rCCA to assess the correlation structure of the metabolomics and  
246 microRNA data. Figs 3 and 4 shows the baseline and stress-delta correlations of microRNAs  
247 and metabolites derived from the rCCA analysis. Only 6 of the baseline and 18 of the 64 stress-  
248 delta metabolites showed correlations above 0.65 with specific microRNAs, suggesting that  
249 combining the two datasets provided additive information.

250 **Figs 3 and 4. Regularized Canonical Correlation Analysis Heat Map of MicroRNAs**  
251 **and Metabolites.** Regularized Canonical Correlation Analysis heatmap showing

252 correlations between baseline (3) and stress-delta (4) microRNAs and metabolites as a  
253 result of stress testing.

254

255 For the integrative discriminant analysis, both the baseline model and the stress-delta  
256 model produced a single latent component. We calculated error rates for our integrated analysis  
257 model for predicting cases or controls. Integrative analysis of metabolite levels and microRNA  
258 expression at baseline showed modest performance for distinguishing cases from controls, with  
259 an overall error rate of 0.143 (Table 3). Using stress-delta data actually led to a worse error  
260 (0.500) for distinguishing cases from controls.

261

262 Table 3. Integrative Model Performance. Error rates are shown for each group individually  
263 (Case and Control). The weighted vote error rate is calculated by assigning each data set a  
264 weight based on the correlation between its latent component and the outcome.

| <b>Group</b>       | <b>Weighted Vote Baseline</b> | <b>Weighted Vote Stress Delta</b> |
|--------------------|-------------------------------|-----------------------------------|
| Case               | 0.000                         | 0.571                             |
| Control            | 0.286                         | 0.429                             |
| Overall Error Rate | 0.143                         | 0.500                             |

265

266 Figs 5 and 6 show a plot of individual subject scores for microRNA and metabolites  
267 latent components, using only those microRNAs and metabolites that were retained in the  
268 baseline and stress-delta integrative model. Cases and controls can be visually separated along  
269 these two axes representing each category's latent component. It should be noted that these  
270 results represent a best-case estimate of our model's ability to distinguish cases from controls  
271 given that the model was tested on the same data that it was trained on.

272 **Fig 5 and 6. Plot of Coordinates for Individual Patients from the Baseline (Fig 5)**  
273 **and Stress-Delta (Fig 6) Integrative Model Using Both Metabolomic and MicroRNA**  
274 **Data.** Control (grey triangle) vs. case (red circle) separation in the stress-delta  
275 integrative model.

276  
277 Finally, we present the results for loadings to the model. These metabolites and  
278 microRNAs are the ones that were the most influential on the latent component. For the  
279 baseline model, the two analytes with the highest loadings were mir-665 and C18:1-DC. The  
280 loadings of selected metabolites and microRNAs for the component in the stress-delta model  
281 are shown in Fig 7. Analytes with the highest loadings are relatively equally divided between  
282 metabolites and microRNAs, suggesting value in combining both datasets.

283 **Fig 7. Metabolite and MicroRNA Loadings from the Latent Component Of Stress-**  
284 **Delta Integrative Model.** Specific stress-delta metabolites and microRNAs that loaded  
285 to the latent component of the stress-delta model is shown. Case samples cluster on the  
286 lower end of the first component. A negative loading for a particular analyte indicates it  
287 increased in cases, whereas a positive loading indicates that is increased in controls.

288

## 289 **DISCUSSION**

290 Although the observable features of myocardial ischemia have been noted for almost a  
291 century(29), stress testing has largely remain unchanged for the past three decades(5). Current  
292 stress test modalities do not widely utilize multiple modes of information to enhance prediction  
293 accuracy. Simple examples of multi-modal stress tests exist, e.g. the Duke Treadmill Score(30),  
294 which combines exercise tolerance information and electrocardiogram characteristics to make a  
295 prediction of future risk. However, these multi-modal stress tests do not take advantage of the  
296 large amounts of data that we are currently capable of collecting from patients' blood samples.

297 Although our current modalities of stress testing are sensitive for obstructive coronary disease,  
298 their accuracy can be further improved, particularly for identifying specific high-risk phenotypes  
299 that benefit from emerging therapies.

300

301 In contrast to the blood-based biomarker approach for evaluation of acute myocardial  
302 infarction, currently assessment for myocardial ischemia and/or obstructive coronary artery is  
303 heavily imaging-dependent. Use of serial biomarkers is not routine practice for assessing  
304 myocardial ischemia, especially in the context of a stress test. Thus, this study presents a novel  
305 paradigm for assessing patients for myocardial ischemia. Our current ability to serially measure  
306 multiple blood-based molecules presents an opportunity to develop more sophisticated multi-  
307 modal stress tests that incorporate large amounts of data.

308

309 We have previously examined the utility of blood-based biomarkers to enhance cardiac  
310 stress testing(19, 21, 22). In this pilot study, we outline the methodology to further develop a  
311 biomarker-augmented stress test using a precision medicine approach. First, we identified  
312 several differences at baseline, post-stress, and stress-delta between cases and controls,  
313 largely as a consequence of the large number of analytes we assessed. While a great deal of  
314 prior literature has examined baseline (resting) biomarkers for prediction of coronary heart  
315 disease, stress-delta biomarker assessments give us the ability to assess acute changes in  
316 response to a controlled ischemic event, with the benefit of within-patient control for baseline  
317 values. We were able to assess a large number of potential biomarkers in each blood sample,  
318 creating the possibility of a systems biology approach to biomarker discovery.

319

320 Systems biology is an efficient approach to both understanding pathophysiologic  
321 mechanisms and identifying clinically useful biomarkers. MicroRNAs are an ideal clinical  
322 biomarker target to identify myocardial ischemia because their peripheral blood concentration

323 can change rapidly in response to disease and they remain stable and detectable in the  
324 peripheral bloodstream. Our study demonstrates that microRNAs can be easily isolated from  
325 peripheral blood plasma and analyzed accurately in serial fashion. Furthermore, many  
326 candidate microRNAs appear to differentiate patients with myocardial ischemia from those with  
327 normal studies, suggesting promise for future studies in larger patient cohorts.

328

329         Likewise, metabolomics may be an ideal means to obtain information on the viability of  
330 the heart because of the organ's dynamic nature. Numerous studies have demonstrated that  
331 resting baseline metabolite abnormalities are associated with adverse cardiovascular  
332 outcomes(18, 31, 32). Furthermore, myocardial ischemia is known to cause dysregulated  
333 energy utilization of myocardial cells(33). A previous study(17) demonstrated that a number of  
334 metabolites change dynamically in patients with ischemic stress tests compared to normal  
335 controls. Our prior work showed that alanine, C14:1-OH, C16:1, C18:2, C20:4 demonstrated  
336 patterns of acute changes in ischemic patients that were different from normal controls. In the  
337 current study, our small sample size was underpowered to confirm or refute this finding.  
338 However, combining metabolomics with microRNA data did provide additive diagnostic  
339 information. Other categories of molecules could be used in a precision medicine stress test,  
340 such as proteomics, immune mediators, catecholamine levels, and traditional markers of  
341 cardiac necrosis or stress.

342

343         As a pilot study, there are many limitations to this analysis. The small sample size and  
344 large number of analytes examined precludes us from making definitive statements about the  
345 importance of any specific analyte for our stress-delta paradigm. It is important to note that the  
346 error rates represent a best-case estimate of what is expected given that they are based on the  
347 same data the model was trained on. Our limited sample size prevented us from performing a  
348 validation in an independent cohort. In the future, we hope to collect a large set of samples

349 which will enable us to have separate testing and validation cohorts to fully measure the  
350 robustness of this model. Furthermore, our patients were chosen from a cohort of patients  
351 referred for stress testing in a single center's emergency department observation unit. Use of a  
352 biomarker-augmented stress test needs to be studied in a more representative patient sample in  
353 the future.

354

## 355 **CONCLUSIONS**

356 In this pilot study of patients undergoing cardiac stress testing, we analyzed serially  
357 drawn blood samples for microRNA and metabolite levels. We demonstrated how these data  
358 could be used to differentiate patients with myocardial ischemia on imaging from normal  
359 controls. Based on this pilot, we intend to further study this paradigm of stress testing in a larger  
360 cohort. Our current paradigm of cardiac stress testing can be enhanced by systematic molecular  
361 profiling techniques. Future work should be conducted to identify the specific modalities and/or  
362 analytes that change dynamically in the setting of induced myocardial ischemia.

363

## 364 **Acknowledgements**

365 We would like to acknowledge manuscript preparation assistance by Ms. Ashley Morgan.

366 The dataset(s) supporting the conclusions of this article is(are) included within the article  
367 (and its additional file(s)).

- 368 • Competing interests: Dr. Ginsburg report having an unlicensed patent on a metabolomic  
369 finding. Dr. Ginsburg also serves on the Scientific Advisory Board for CardioDx. Drs.  
370 Ginsburg, Limkakeng, and Voora have received research funding from Abbott  
371 Laboratories. Dr. Limkakeng has also received prior research grants from Roche



372 International, and Siemens Healthcare Diagnostics. No other competing interests to  
373 declare.

- 374 • Funding: The current study was made possible by funding support via a Pilot Grant from  
375 the Emergency Medicine Foundation. Samples were collected in a prior study that was  
376 supported by an investigator-initiated grant from Abbott Laboratories. The authors  
377 retained possession of all data and decision on whether to publish at all times.

378

## References

- 379 1. Heart Disease and Stroke Statistics—2014 Update. *Circulation*. 2013;129:e28-292.
- 380 2. Fleischmann KE, Hunink MG, Kuntz KM, Douglas PS. Exercise echocardiography or  
381 exercise SPECT imaging? A meta-analysis of diagnostic test performance. *JAMA*.  
382 1998;280(10):913-20.
- 383 3. Verani MS. Thallium-201 single-photon emission computed tomography (SPECT) in the  
384 assessment of coronary artery disease. *Am J Cardiol*. 1992;70(14):3E-9E.
- 385 4. Paetsch I, Jahnke C, Ferrari VA, Rademakers FE, Pellikka PA, Hundley WG, et al.  
386 Determination of interobserver variability for identifying inducible left ventricular wall motion  
387 abnormalities during dobutamine stress magnetic resonance imaging. *Eur Heart J*.  
388 2006;27(12):1459-64.
- 389 5. Sawada SG, Ryan T, Conley MJ, Corya BC, Feigenbaum H, Armstrong WF. Prognostic  
390 value of a normal exercise echocardiogram. *Am Heart J*. 1990;120(1):49-55.
- 391 6. Gidlof O, van der Brug M, Ohman J, Gilje P, Olde B, Wahlestedt C, et al. Platelets  
392 activated during myocardial infarction release functional miRNA, which can be taken up by  
393 endothelial cells and regulate ICAM1 expression. *Blood*. 2013;121(19):3908-17, s1-26.
- 394 7. Doran B, Voora D. Circulating extracellular vesicles containing miRNAs may have utility  
395 as early biomarkers for cardiac injury. *Annals of translational medicine*. 2016;4(Suppl 1):S60.
- 396 8. D'Alessandra Y, Devanna P, Limana F, Straino S, Di Carlo A, Brambilla PG, et al.  
397 Circulating microRNAs are new and sensitive biomarkers of myocardial infarction. *European*  
398 *heart journal*. 2010;31(22):2765-73.

- 399 9. Wang R, Li N, Zhang Y, Ran Y, Pu J. Circulating microRNAs are promising novel  
400 biomarkers of acute myocardial infarction. *Internal medicine (Tokyo, Japan)*. 2011;50(17):1789-  
401 95.
- 402 10. Long G, Wang F, Duan Q, Chen F, Yang S, Gong W, et al. Human circulating microRNA-1  
403 and microRNA-126 as potential novel indicators for acute myocardial infarction. *International*  
404 *journal of biological sciences*. 2012;8(6):811-8.
- 405 11. Ai J, Zhang R, Li Y, Pu J, Lu Y, Jiao J, et al. Circulating microRNA-1 as a potential novel  
406 biomarker for acute myocardial infarction. *Biochemical and biophysical research*  
407 *communications*. 2010;391(1):73-7.
- 408 12. Oerlemans MI, Mosterd A, Dekker MS, de Vrey EA, van Mil A, Pasterkamp G, et al. Early  
409 assessment of acute coronary syndromes in the emergency department: the potential  
410 diagnostic value of circulating microRNAs. *EMBO molecular medicine*. 2012;4(11):1176-85.
- 411 13. De Rosa S, Fichtlscherer S, Lehmann R, Assmus B, Dimmeler S, Zeiher AM. Transcoronary  
412 concentration gradients of circulating microRNAs. *Circulation*. 2011;124(18):1936-44.
- 413 14. Devaux Y, Vausort M, Goretti E, Nazarov PV, Azuaje F, Gilson G, et al. Use of circulating  
414 microRNAs to diagnose acute myocardial infarction. *Clinical chemistry*. 2012;58(3):559-67.
- 415 15. Zampetaki A, Willeit P, Tilling L, Drozdov I, Prokopi M, Renard JM, et al. Prospective  
416 study on circulating MicroRNAs and risk of myocardial infarction. *Journal of the American*  
417 *College of Cardiology*. 2012;60(4):290-9.
- 418 16. DeFilippis AP, Trainor PJ, Hill BG, Amraotkar AR, Rai SN, Hirsch GA, et al. Identification of  
419 a plasma metabolomic signature of thrombotic myocardial infarction that is distinct from non-

- 420 thrombotic myocardial infarction and stable coronary artery disease. PloS one.  
421 2017;12(4):e0175591.
- 422 17. Sabatine MS, Liu E, Morrow DA, Heller E, McCarroll R, Wiegand R, et al. Metabolomic  
423 identification of novel biomarkers of myocardial ischemia. *Circulation*. 2005;112(25):3868-75.
- 424 18. Shah SH, Sun JL, Stevens RD, Bain JR, Muehlbauer MJ, Pieper KS, et al. Baseline  
425 metabolomic profiles predict cardiovascular events in patients at risk for coronary artery  
426 disease. *American heart journal*. 2012;163(5):844-50 e1.
- 427 19. Limkakeng AT, Jr., Henao R, Voora D, O'Connell T, Griffin M, Tsalik EL, et al. Pilot study of  
428 myocardial ischemia-induced metabolomic changes in emergency department patients  
429 undergoing stress testing. *PloS one*. 2019;14(2):e0211762.
- 430 20. Yu XT, Zeng T. Integrative Analysis of Omics Big Data. *Methods in molecular biology*  
431 (Clifton, NJ). 2018;1754:109-35.
- 432 21. Limkakeng AT, Jr., Leahy JC, Griffin SM, Lokhnygina Y, Jaffa E, Christenson RH, et al.  
433 Provocative biomarker stress test: stress-delta N-terminal pro-B type natriuretic peptide. *Open*  
434 *heart*. 2018;5(2):e000847.
- 435 22. Limkakeng AJ, Drake W, Lokhnygina Y, Meyers H, Shogilev D, Christenson R, et al.  
436 Myocardial Ischemia on Cardiac Stress Testing Is Not Associated with Changes in Troponin T  
437 Levels. *J of App Lab Med* 2017;5:532-43.
- 438 23. Newgard CB, An J, Bain JR, Muehlbauer MJ, Stevens RD, Lien LF, et al. A branched-chain  
439 amino acid-related metabolic signature that differentiates obese and lean humans and  
440 contributes to insulin resistance. *Cell metabolism*. 2009;9(4):311-26.

- 441 24. : Babraham Bioinformatics; 2019 [Available from:  
442 [http://www.bioinformatics.babraham.ac.uk/projects/trim\\_galore](http://www.bioinformatics.babraham.ac.uk/projects/trim_galore).
- 443 25. Martin M. Cutadapt removes adapter sequences from high-throughput sequencing  
444 reads. *EMBnetjournal*. 2011;17(1):10.
- 445 26. Langmead B, Trapnell C, Pop M, Salzberg SL. Ultrafast and memory-efficient alignment  
446 of short DNA sequences to the human genome. *Genome Biol*. 2009;10(3):R25.
- 447 27. Kozomara A, Griffiths-Jones S. miRBase: annotating high confidence microRNAs using  
448 deep sequencing data. *Nucleic Acids Res*. 2014;42(Database issue):D68-73.
- 449 28. Love MI, Huber W, Anders S. Moderated estimation of fold change and dispersion for  
450 RNA-seq data with DESeq2. *Genome Biol*. 2014;15(12):550.
- 451 29. Tennant R, Wiggers C. The effects of coronary occlusion on myocardial contraction. . *Am*  
452 *J Physiol*. 1935;112::351-61.
- 453 30. Mark DB, Shaw L, Harrell FE, Jr., Hlatky MA, Lee KL, Bengtson JR, et al. Prognostic value  
454 of a treadmill exercise score in outpatients with suspected coronary artery disease. *The New*  
455 *England journal of medicine*. 1991;325(12):849-53.
- 456 31. Wurtz P, Havulinna AS, Soininen P, Tynkkynen T, Prieto-Merino D, Tillin T, et al.  
457 Metabolite profiling and cardiovascular event risk: a prospective study of 3 population-based  
458 cohorts. *Circulation*. 2015;131(9):774-85.
- 459 32. Shah SH, Bain JR, Muehlbauer MJ, Stevens RD, Crosslin DR, Haynes C, et al. Association  
460 of a peripheral blood metabolic profile with coronary artery disease and risk of subsequent  
461 cardiovascular events. *Circulation Cardiovascular genetics*. 2010;3(2):207-14.

462 33. Turer AT, Lewis GD, O'Sullivan JF, Elmariah S, Mega JL, Addo TA, et al. Increases in  
463 myocardial workload induced by rapid atrial pacing trigger alterations in global metabolism.  
464 PloS one. 2014;9(6):e99058.

465

466

## 467 **Supporting information**

468 **S1 File. Concentrations Of Assayed Amino Acids And Acylcarnitines Both Before**  
469 **And After Stress Testing.**

470 **S2 File. Differentially expressed MicroRNAs between Cases and Controls at**  
471 **Baseline and Stress Delta.**

472 **S1 Fig. Pre-Stress Test Principal Component Analysis Plot for MicroRNAs.**

473 Principal component analysis of microRNA concentrations before stress testing to  
474 differentiate between case (myocardial ischemia) and matched control patients.

475 **S2 Fig. Post-Stress Test Principal Component Analysis Plot for MicroRNAs.**

476 Principal component analysis of microRNA concentrations after stress testing to  
477 differentiate between case (myocardial ischemia) and matched control patients.

478 **S3 Fig. Principal Component Analysis Plot for MicroRNAs Pre-Stress Test Versus**  
479 **Post-Stress Test.** Principal component analysis of microRNA concentrations from  
480 before stress testing and after stress testing.

481 **S4 Fig. Receiver Operator Curve for Metabolites.** Stress-delta metabolite  
482 concentrations showed strong discriminative abilities individually. These results  
483 represent best case scenarios due to lack of validation cohort.

484 **S5 Fig. Receiver Operator Curve for MicroRNA.** Stress-delta MicroRNA  
485 concentrations showed strong discriminative abilities individually. These results  
486 represent best case scenarios due to lack of validation cohort.

487

bioRxiv preprint doi: <https://doi.org/10.1101/2020.02.06.936757>; this version posted February 6, 2020. The copyright holder for this preprint (which was not certified by peer review) is the author/funder, who has granted bioRxiv a license to display the preprint in perpetuity. It is made available under aCC-BY 4.0 International license.

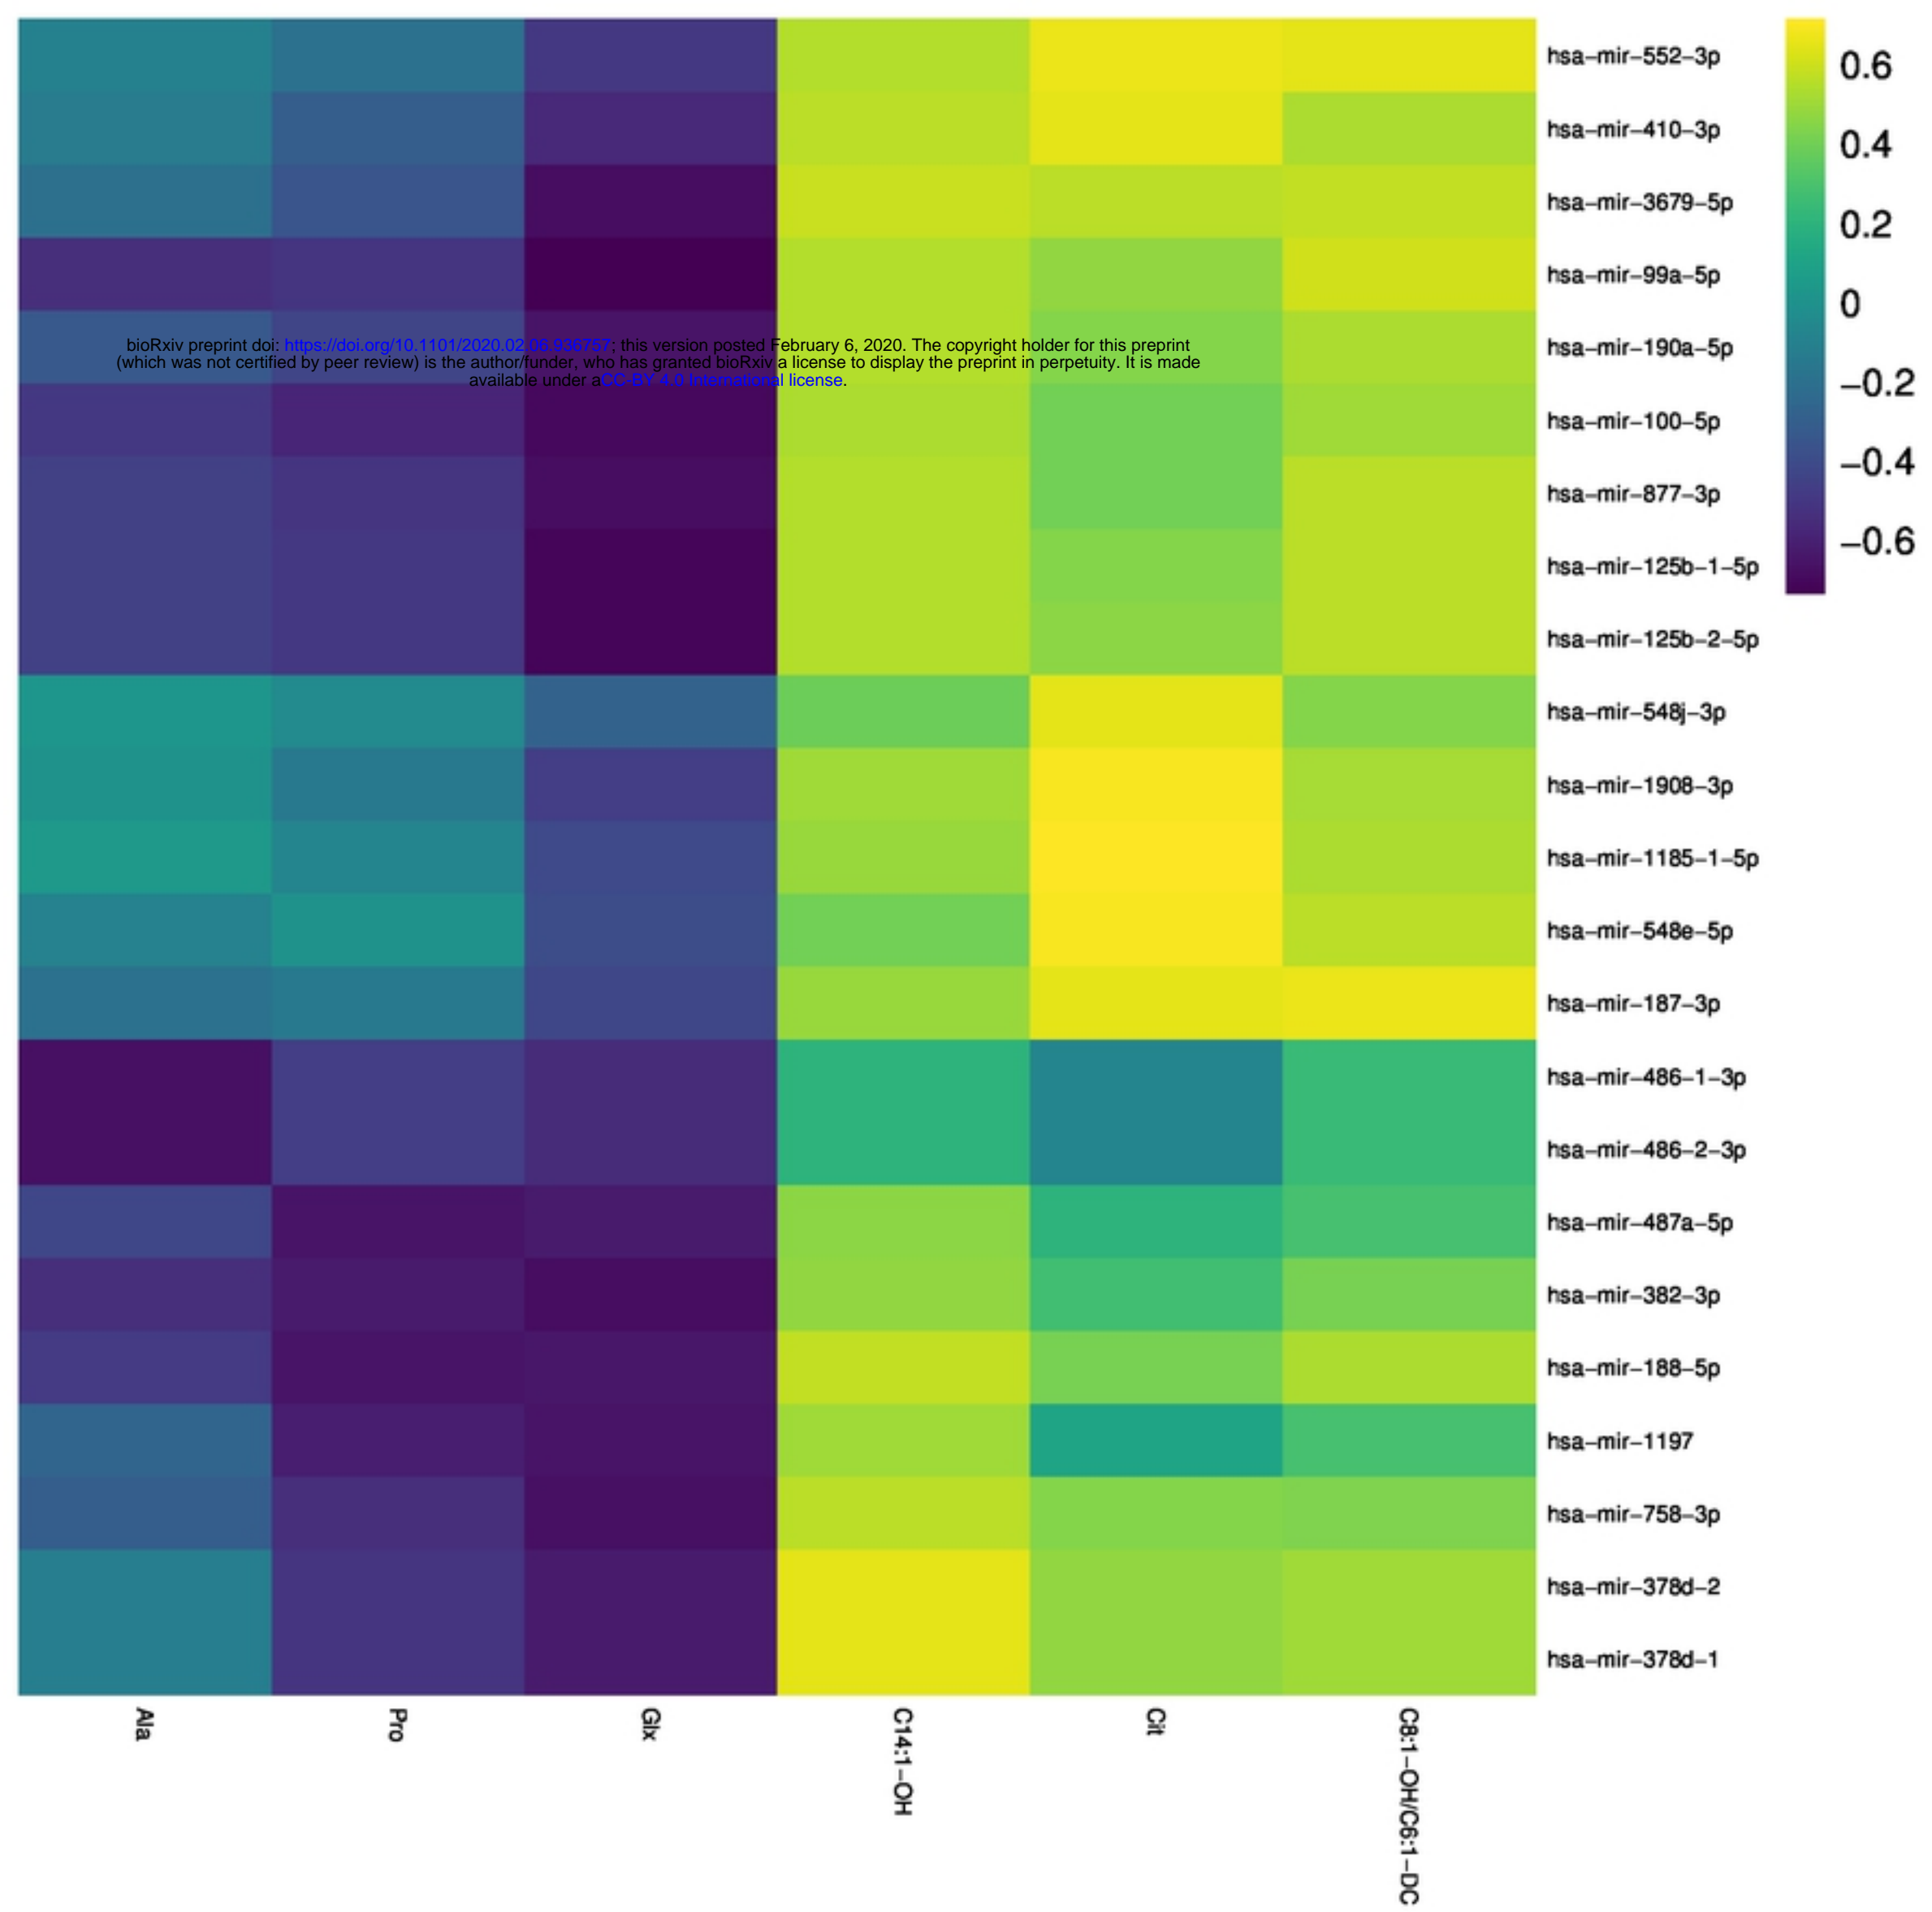

Figure 3



bioRxiv preprint doi: <https://doi.org/10.1101/2020.02.06.936757>; this version posted February 6, 2020. The copyright holder for this preprint (which was not certified by peer review) is the author/funder, who has granted bioRxiv a license to display the preprint in perpetuity. It is made available under aCC-BY 4.0 International license.

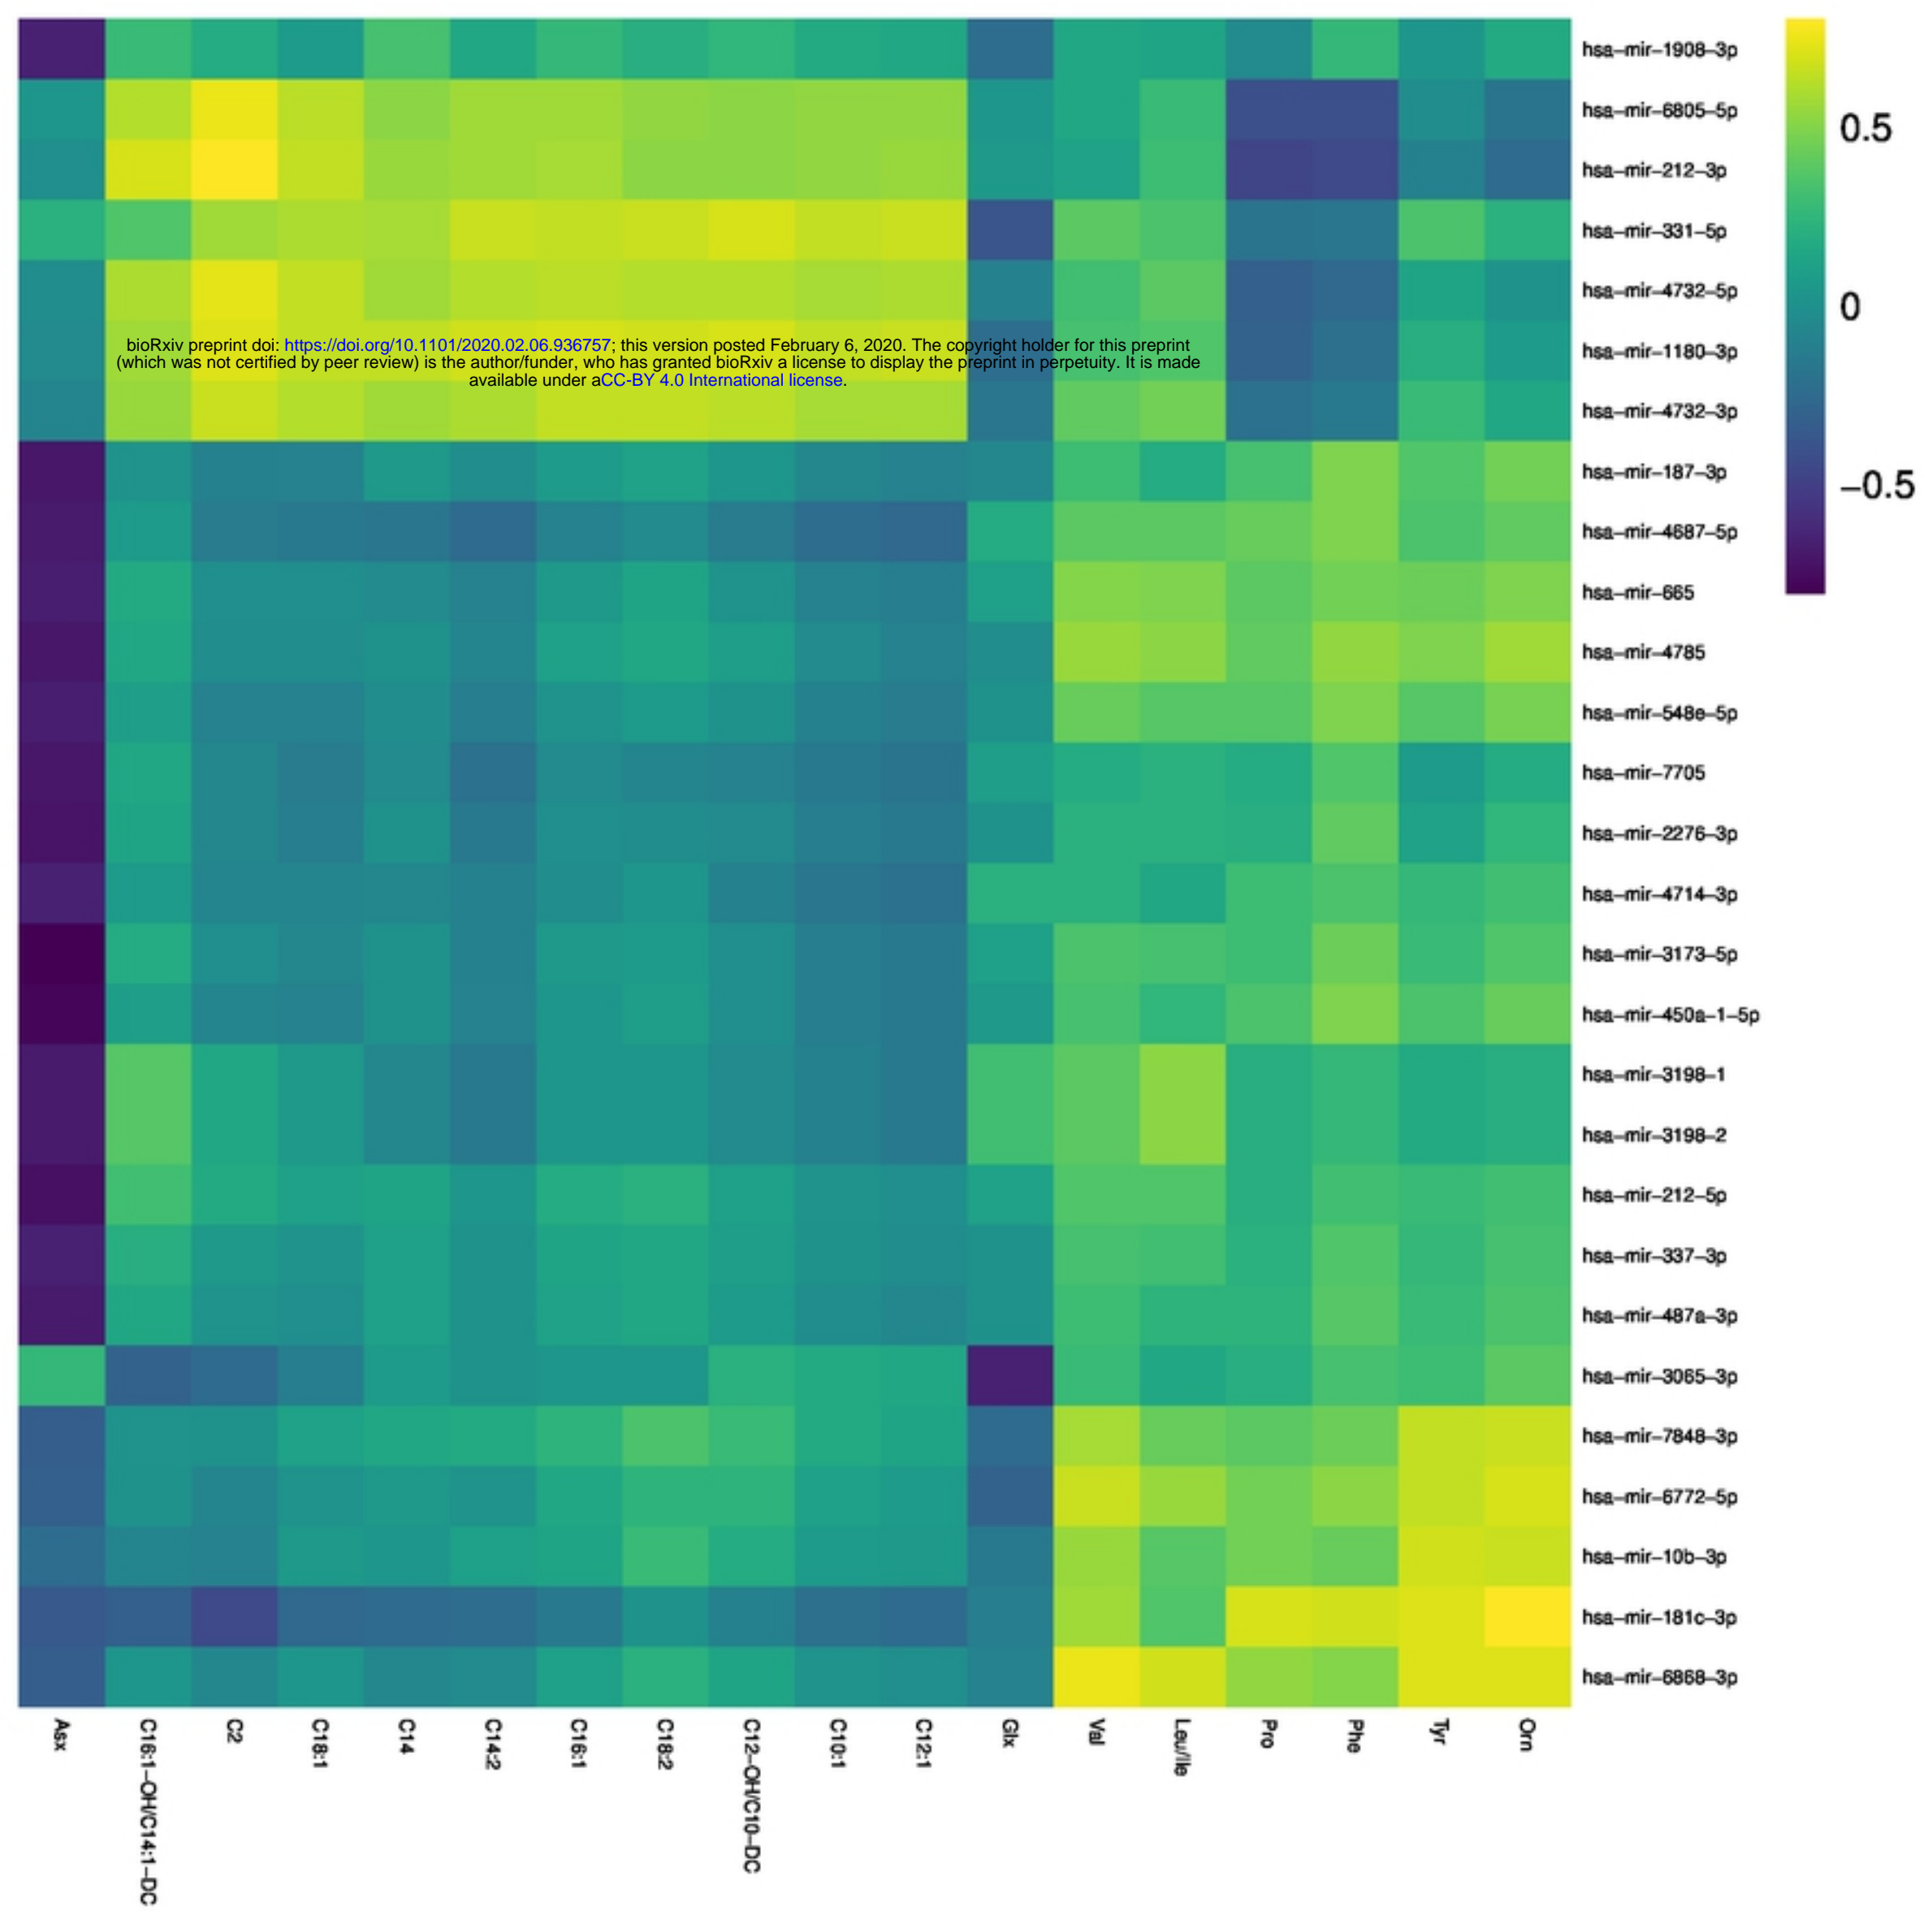

Figure 4

# DIABLO loadings plot : Delta Metabolite and microRNA

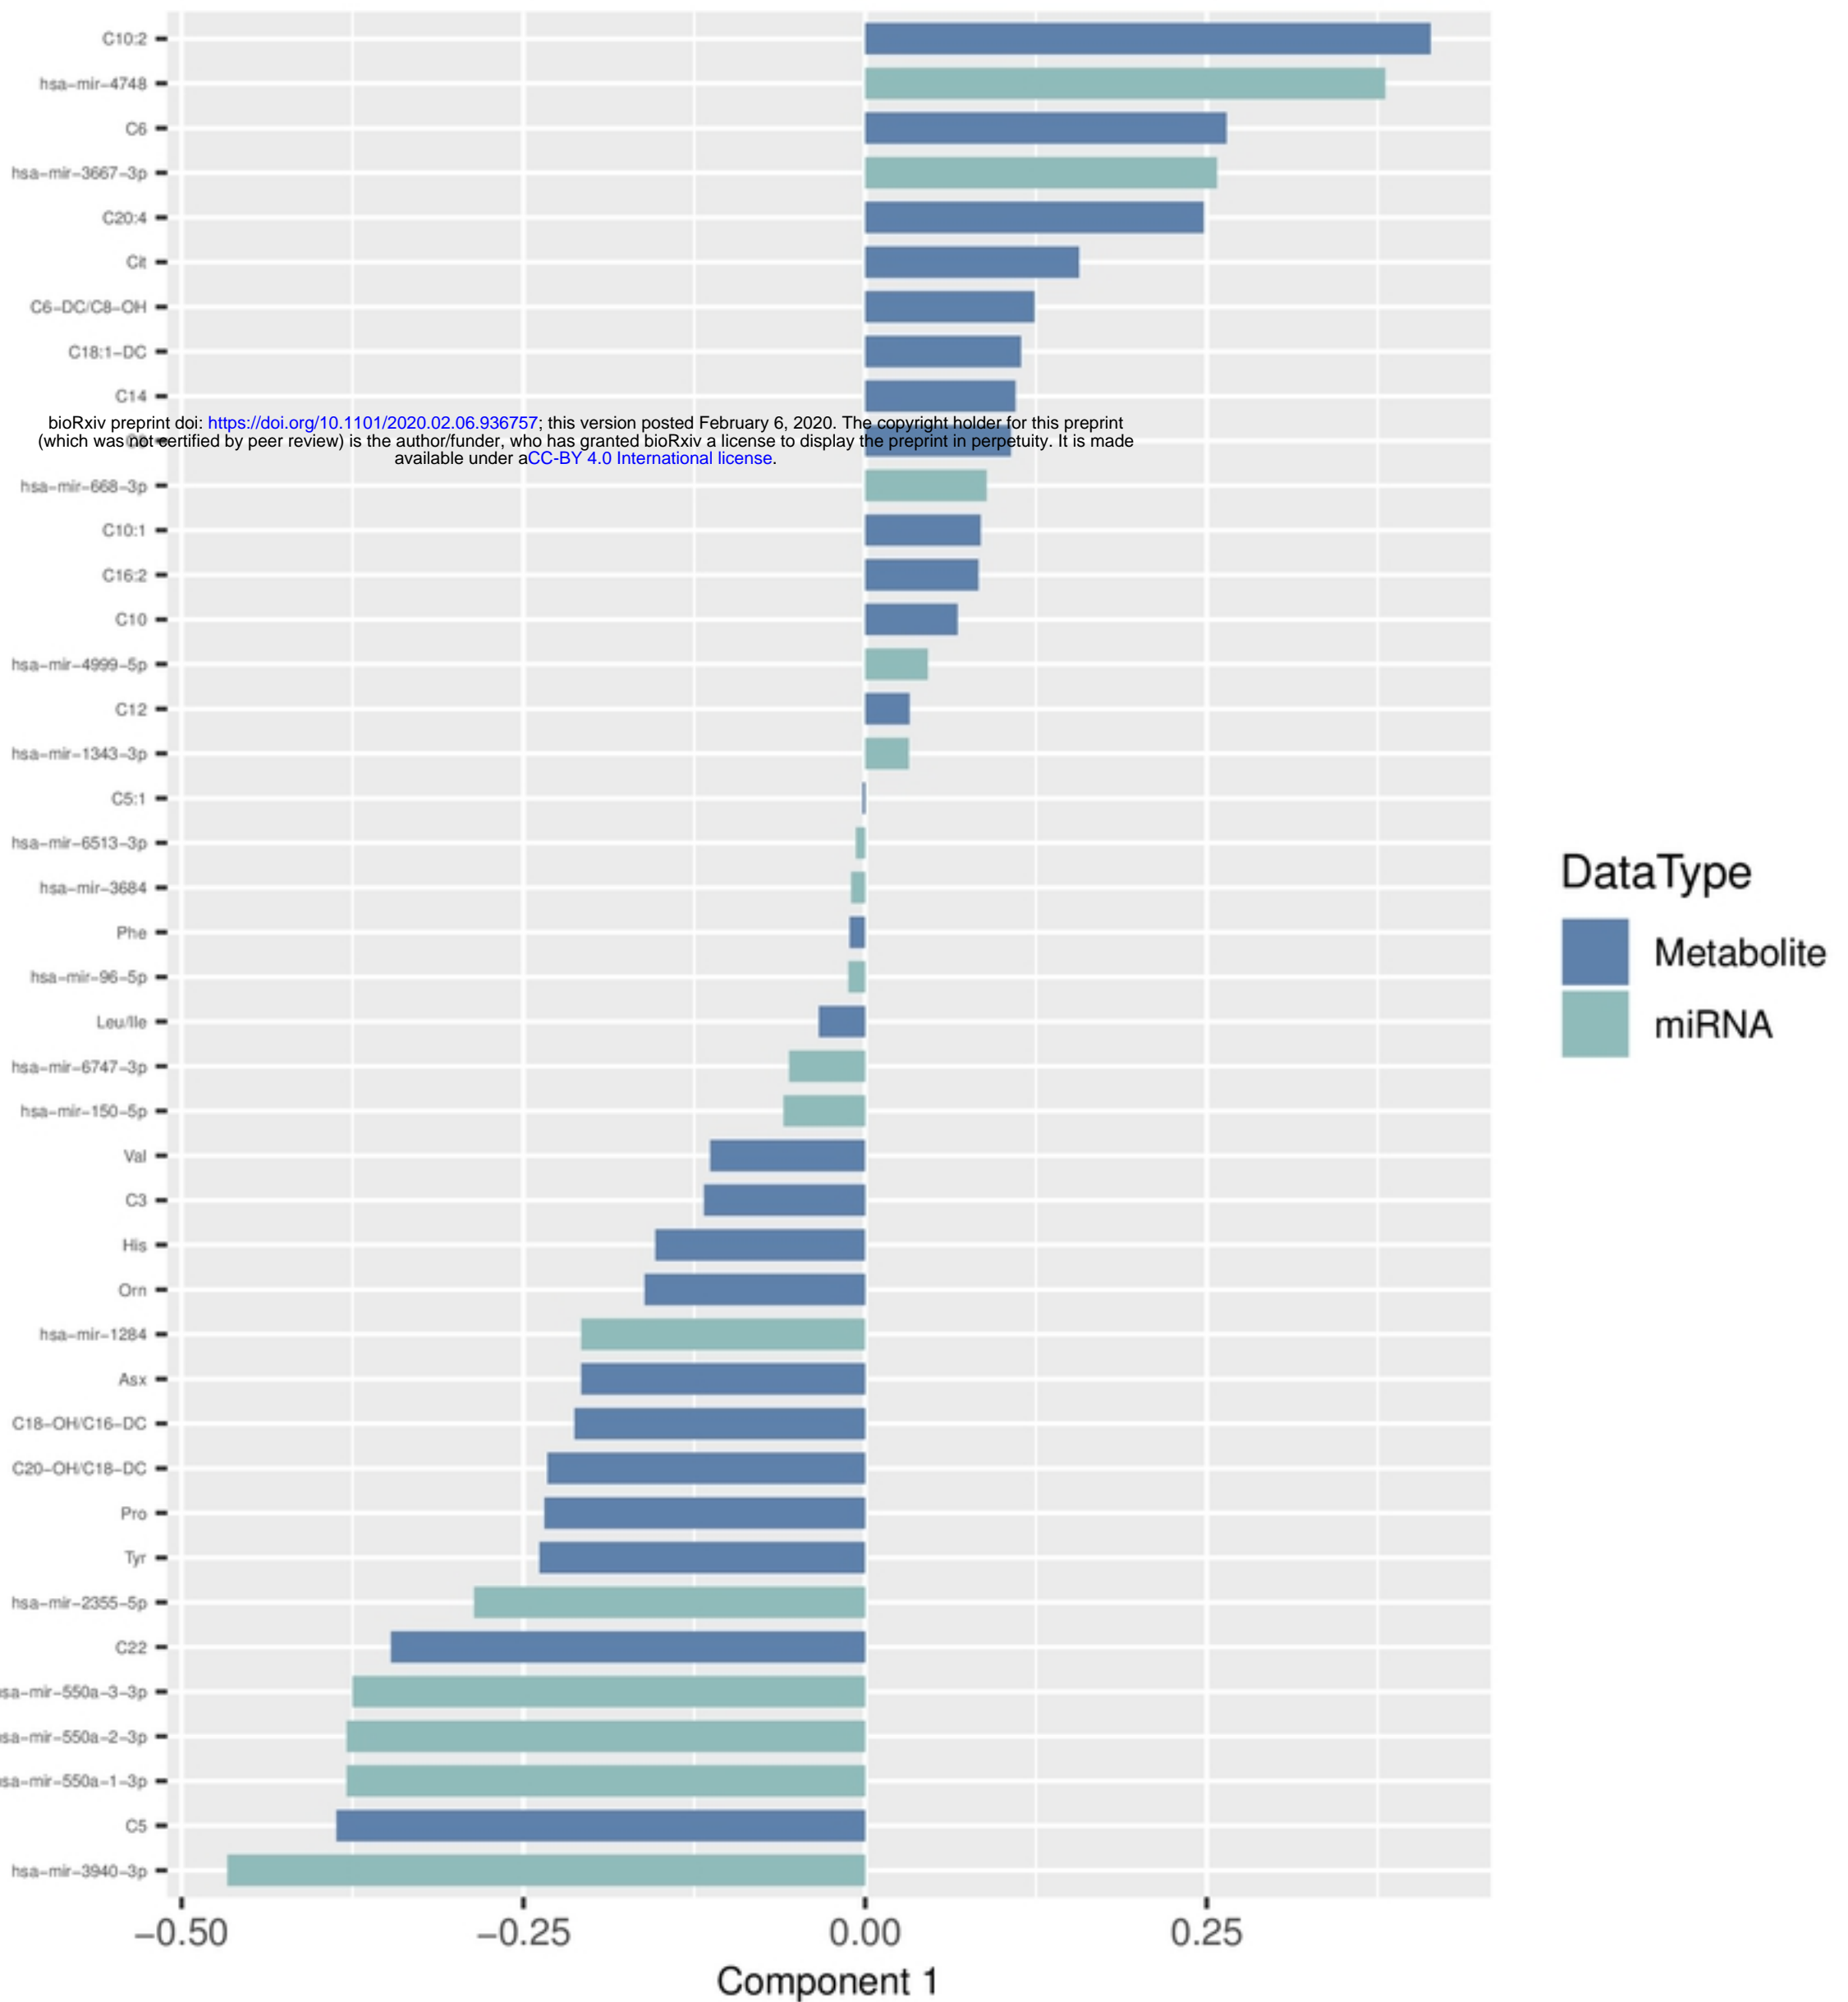

Figure 7

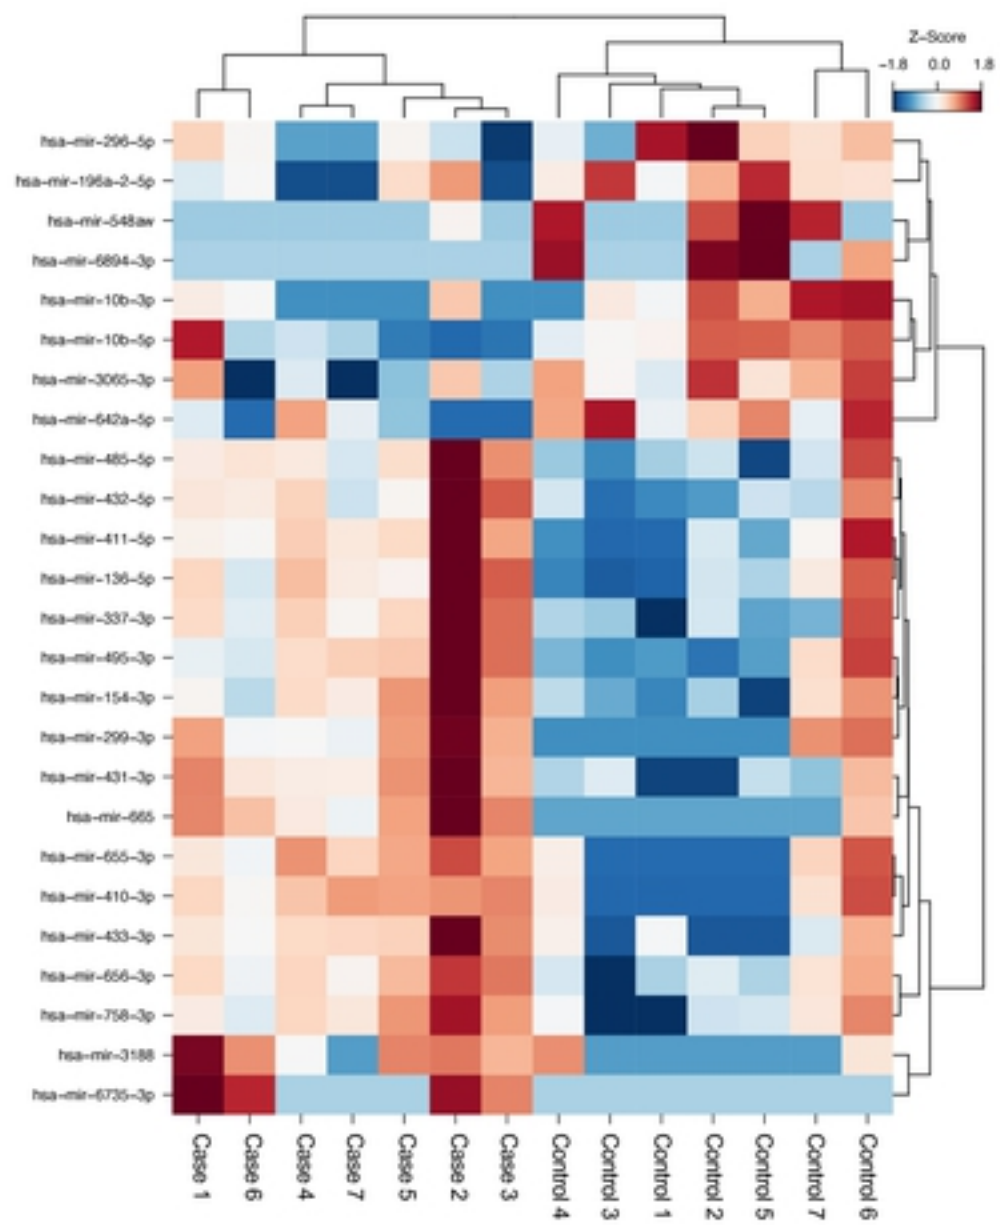

Figure 1

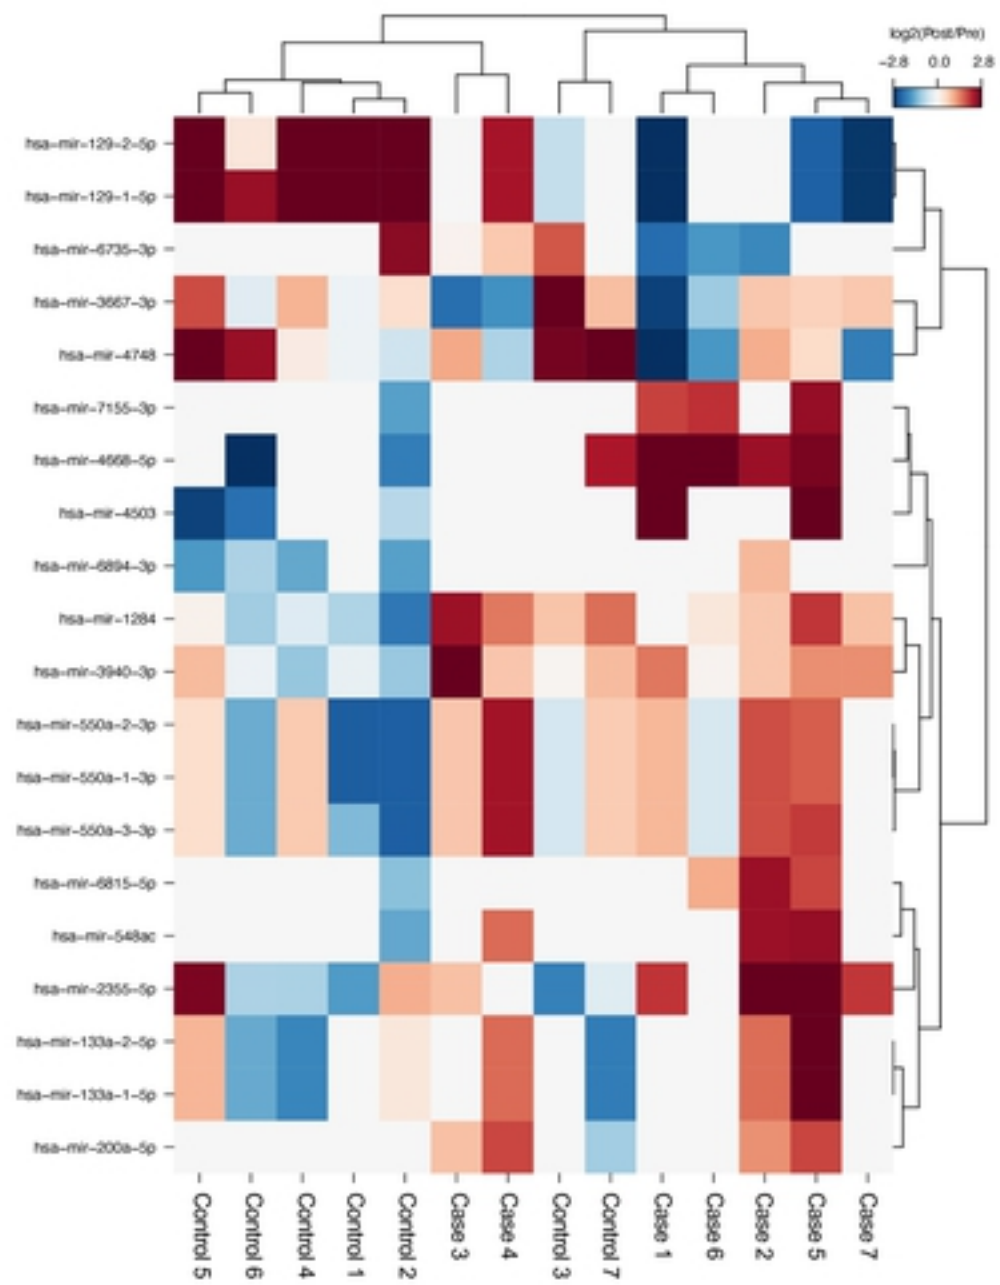

Figure 2

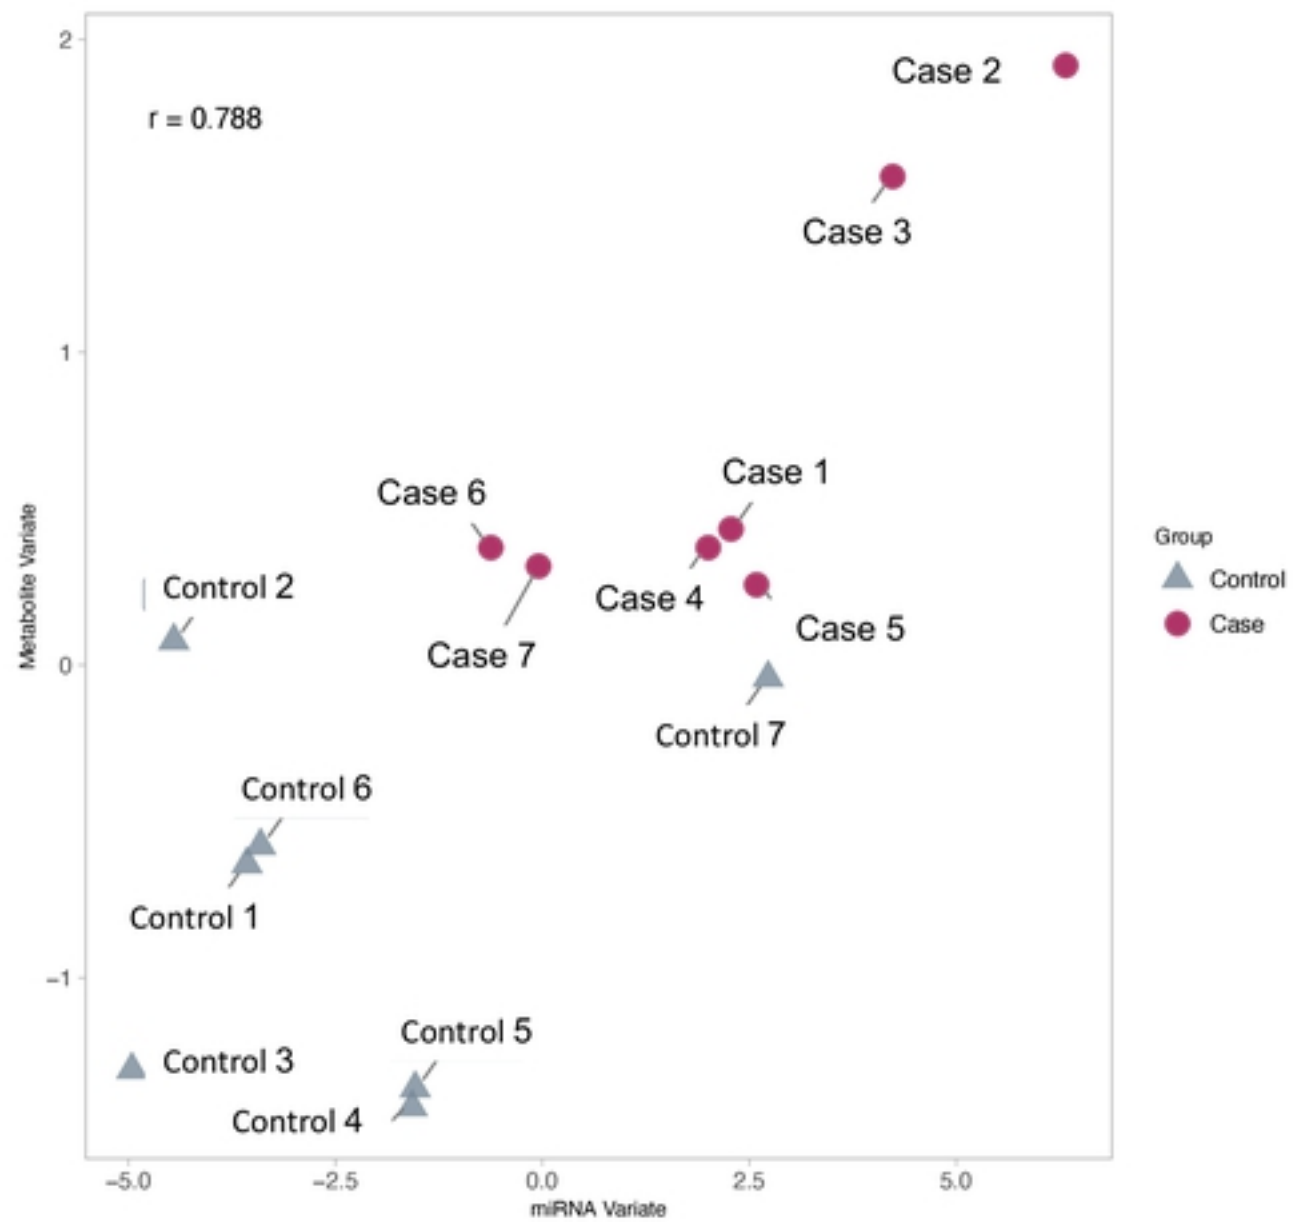

Figure 5

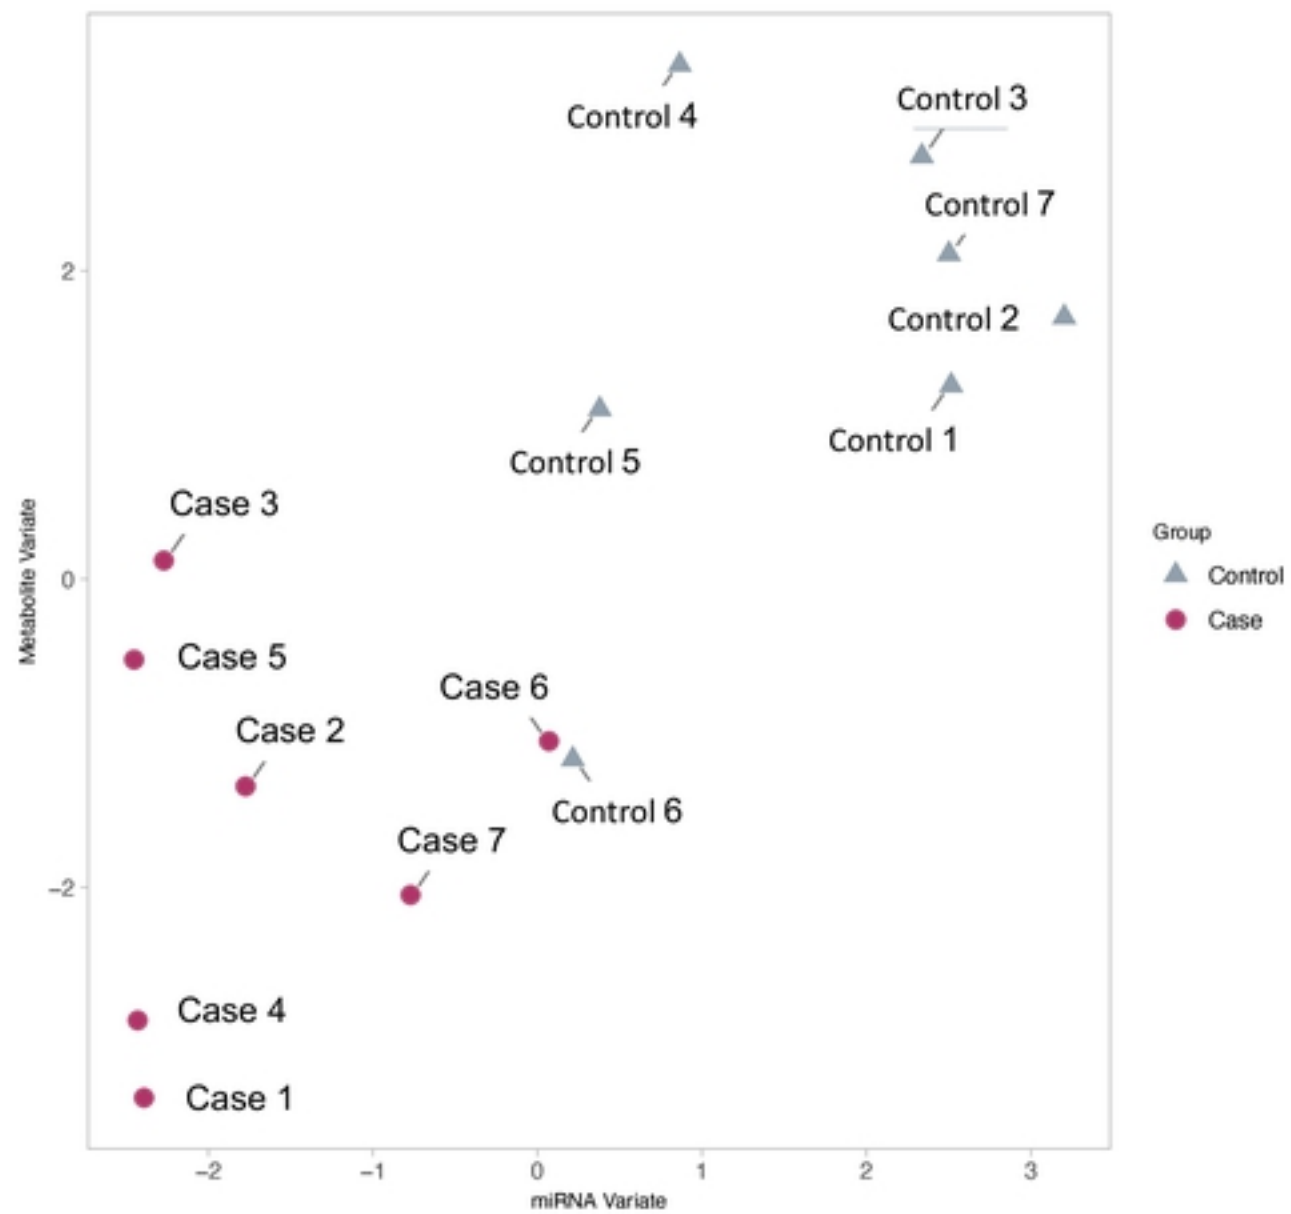

Figure 6
